# Supplementary material for: Genetic Analysis of Adaptive Traits in Spring Wheat in Northeast China
Source: MDPI journal article supplement (doi:10.3390/life14020168), 2024-01-24
Supplement: s1 [file s1]

|   |                                                                                                                                                                                                                                          |                   |                                     |             |                                                       |
|---|------------------------------------------------------------------------------------------------------------------------------------------------------------------------------------------------------------------------------------------|-------------------|-------------------------------------|-------------|-------------------------------------------------------|
| 1 | <b>Table S3</b> The primers of the <i>Kasp_2D_PH</i> and <i>Kasp_6D_HD</i>                                                                                                                                                               |                   |                                     |             |                                                       |
|   | SNP marker                                                                                                                                                                                                                               | KASP marker       | Physical position (Mb) <sup>a</sup> | Primer name | Sequence (5'to 3') <sup>b</sup>                       |
|   | <i>AX-111096297</i>                                                                                                                                                                                                                      | <i>Kasp_2D_PH</i> | 33.0                                | FAM         | <b>GAAGGTGACCAAGTTCATGCT</b> ATAGCTCTGGCACTGCACCG     |
|   |                                                                                                                                                                                                                                          |                   |                                     | HEX         | <b>GAAGGTCGGAGTCAACGGATT</b> ATAGCTCTGGCACTGCACCC     |
|   |                                                                                                                                                                                                                                          |                   |                                     | Common      | TCAGGACAGACCAAGGAGATT                                 |
|   | <i>AX-110918412</i>                                                                                                                                                                                                                      | <i>Kasp_6D_HD</i> | 464.9                               | FAM         | <b>GAAGGTGACCAAGTTCATGCT</b> ACGAGCCGTTGTACTTATAATGGA |
|   |                                                                                                                                                                                                                                          |                   |                                     | HEX         | <b>GAAGGTCGGAGTCAACGGATT</b> ACGAGCCGTTGTACTTATAATGGC |
|   |                                                                                                                                                                                                                                          |                   |                                     | Common      | TGGTATTACGAGGGCCGAAC                                  |
| 2 | <sup>a</sup> Physical position (Mb) were obtained by blasting SNP flanking sequences against the Chinese Spring RefSeq v1.1 ( <a href="https://urgi.versailles.inra.fr/blast_iwgsc/">https://urgi.versailles.inra.fr/blast_iwgsc/</a> ). |                   |                                     |             |                                                       |
| 3 | <sup>b</sup> FAM and HEX tails used for KASP marker assays are bolded.                                                                                                                                                                   |                   |                                     |             |                                                       |
